# Supplementary material for: Novel Nanoarchitectured Cu2Te as a Photocathodes for Photoelectrochemical Water Splitting Applications
Source: MDPI journal article supplement (doi:10.3390/nano12183192), 2022-09-14
Supplement: s1 [file s1]

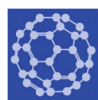

# Novel Nanoarchitected Cu<sub>2</sub>Te as a Photocathodes for Photoelectrochemical Water Splitting Applications

Dong Jin Lee <sup>1</sup>, G. Mohan Kumar <sup>1</sup>, V. Ganesh <sup>2</sup>, Hee Chang Jeon <sup>1</sup>, Deuk Young Kim <sup>1,3</sup>, Tae Won Kang <sup>1</sup> and P. Ilanchezhiyan <sup>1,\*</sup>

<sup>1</sup> Quantum-Functional Semiconductor Research Center (QSRC), Institute of Future Technology, Dongguk University—Seoul, 04623 Seoul, Korea

<sup>2</sup> Department of Physics and Nanotechnology, SRM Institute of Science and Technology, Kattankulathur, Chennai 603203, India

<sup>3</sup> Division of Physics and Semiconductor Science, Dongguk University—Seoul, 04623 Seoul, Korea

\* Correspondence: ilanchezhiyan@dongguk.edu

## 1. Characterizations

The morphological characteristics of Cu<sub>2</sub>Te samples are analyzed by scanning electron microscopy (SEM) (JEOL JSM-6380, operated at 15 kV) and high-resolution transmission electron microscopy (HRTEM). The phase purity and crystal structure of Cu<sub>2</sub>Te NRs and vertical NSs was inferred through Panalytical XPert pro X-ray diffractometer with Cu-K $\alpha$  radiation (40 kV, 30 mA,  $\lambda=1.5418$  Å). The Raman measurements were performed in a micro-Raman spectrometer using an excitation wavelength of 532 nm. The chemical composition of the Cu<sub>2</sub>Te NRs and vertical NSs was obtained using X-ray photoelectron spectroscopy (XPS-PHI 660).

## 2. Photoelectrochemical studies

The photoelectrochemical properties Cu<sub>2</sub>Te NRs and vertical NSs photocathodes were measured using CHI 200 potentiostat using a three electrode configuration. The VPE grown Cu<sub>2</sub>Te NRs and vertical NSs on Cu foil were used as working electrodes, with Ag/AgCl and Pt as reference and counter electrode. All tests were measured in a 0.5 M Na<sub>2</sub>SO<sub>4</sub> electrolyte. The photoresponse was measured under a continuous irradiation from a 300 W Xe lamp, and the visible light intensity were calibrated to 100 mW/cm<sup>2</sup> for the incidence onto the photocathode. The area of the photocathode exposed to light was 0.5 cm<sup>2</sup>. The photoelectrochemical beaker was positioned 15 cm away from the xenon lamp. Photocurrent stability tests were carried out by measuring the photocurrent under chopped light irradiation at a fixed potential of 0 V vs. RHE. Before PEC measurement, the electrolyte was continuously bubbled with N<sub>2</sub> to remove oxygen and thus eliminate erroneous signals arising from oxygen reduction. Electrochemical impedance spectra (EIS) were measured with the frequency range from 0.1 Hz to 100 kHz under illumination. Mott-Schottky plots were acquired by sweeping the potential at fixed frequencies. Bode phase plots were measured in a frequency range between 0.1 Hz to 100 kHz at open-circuit voltage.

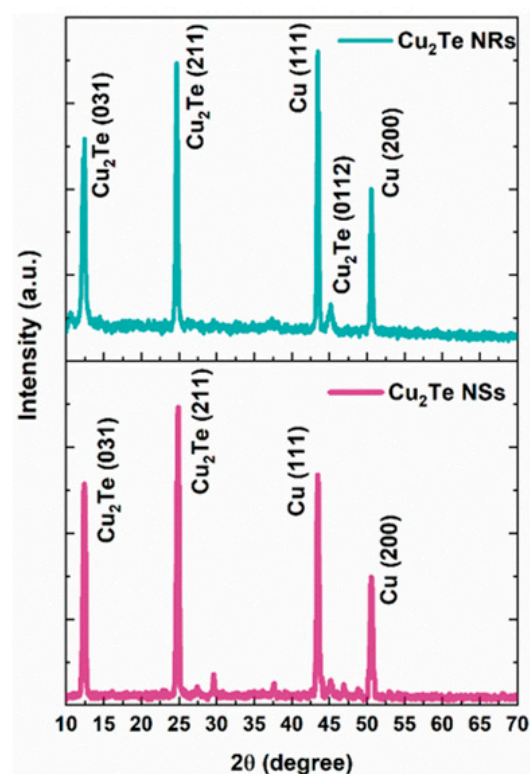

**Figure S1.** X-ray diffraction pattern of Cu<sub>2</sub>Te NRs and vertical NSs after stability test.

**Table S1.** A comparisons of PEC performances of Cu<sub>2</sub>Te photocathodes is given below.

| Cu Based Photocathodes         | Electrolyte                           | Maximum Photocurrents<br>(mA cm <sup>-2</sup> ) | Reference |
|--------------------------------|---------------------------------------|-------------------------------------------------|-----------|
| Cu <sub>2-x</sub> Te/Cu layers | 0.1 M NaNO <sub>3</sub>               | 0.014                                           | [1]       |
| Cu <sub>2</sub> O/Cu foil      | 0.2 M K <sub>2</sub> HPO <sub>4</sub> | 0.47                                            | [2]       |
| Cu <sub>2</sub> O-CuO          | 0.5 M K <sub>2</sub> SO <sub>4</sub>  | 0.36                                            | [3]       |
| CuO-Cu <sub>2</sub> O          | 0.1 M Na <sub>2</sub> SO <sub>4</sub> | 0.50                                            | [4]       |
| Cu-W Oxide                     | pH 11 NaOH                            | 0.0010                                          | [5]       |
| Cu <sub>2</sub> Te NSs/Cu foil | 0.5 M Na <sub>2</sub> SO <sub>4</sub> | 0.53                                            | This work |

**Table S2.** Various parameters extracted from the equivalent circuit fit to the EIS data for Cu<sub>2</sub>Te NRs and NSs photocathodes in 0.5M Na<sub>2</sub>SO<sub>4</sub> electrolyte solutions.

| Samples                | R <sub>s</sub> (Ω) | R <sub>ct</sub> (Ω) | W <sub>z</sub> (Ω) | C <sub>μ</sub> (μF) | χ <sup>2</sup> × 10 <sup>-4</sup> |
|------------------------|--------------------|---------------------|--------------------|---------------------|-----------------------------------|
| Cu <sub>2</sub> Te NSs | 33.74              | 1075                | 0.38               | 15.47               | 5.8                               |
| Cu <sub>2</sub> Te NRs | 21.65              | 2673                | 0.12               | 39.11               | 3.8                               |

## References

1. Caballero-Briones, F.; Palacios-Padrós, A.; Peña, J.L.; Fausto Sanz. Phase tailored, potentiodynamically grown p-Cu<sub>2-x</sub>Te/Cu layers. *Electrochem. commun.* **2008**, *10*, 1684–1687.
2. Dai, P.; Li, W.; Xie, J.; He, Y.; Thorne, J.; McMahon, G.; Zhan, J.; and Wang, D. Forming Buried Junctions to Enhance the Photo-voltage Generated by Cuprous Oxide in Aqueous Solutions. *Angew. Chem. Int. Ed.* **2014**, *53*, 13493–13497.
3. Wang, P.; Ng, Y.H.; Amal, R. Embedment of anodized p-type Cu<sub>2</sub>O thin films with CuO nanowires for improvement in photo-electrochemical stability. *Nanoscale.* **2013**, *5*, 2952–2958.
4. Kim, S.; Kim, H. Cu<sub>2</sub>O Thin Film Photoelectrode Embedded with CuO Nanorods for Photoelectrochemical Water Oxidation. *J. Korean Inst. Surf. Eng.* **2019**, *5*, 258–264.
5. Chen, L.; Shet, S.; Tang, H.; Wang, H.; Deutsch, T.; Yan, Y.; Turner, J.; Al-Jassim, M. Electrochemical deposition of copper oxide nanowires for photoelectrochemical applications. *J. Mater. Chem.* **2010**, *20*, 6962–6967.
